# Supplementary material for: Cold Atmospheric Plasma Exerts Antimicrobial Effects in a 3D Skin Model of Cutaneous Candidiasis
Source: MDPI journal article supplement (doi:10.3390/antibiotics12050933), 2023-05-19
Supplement: s1 [file s1]

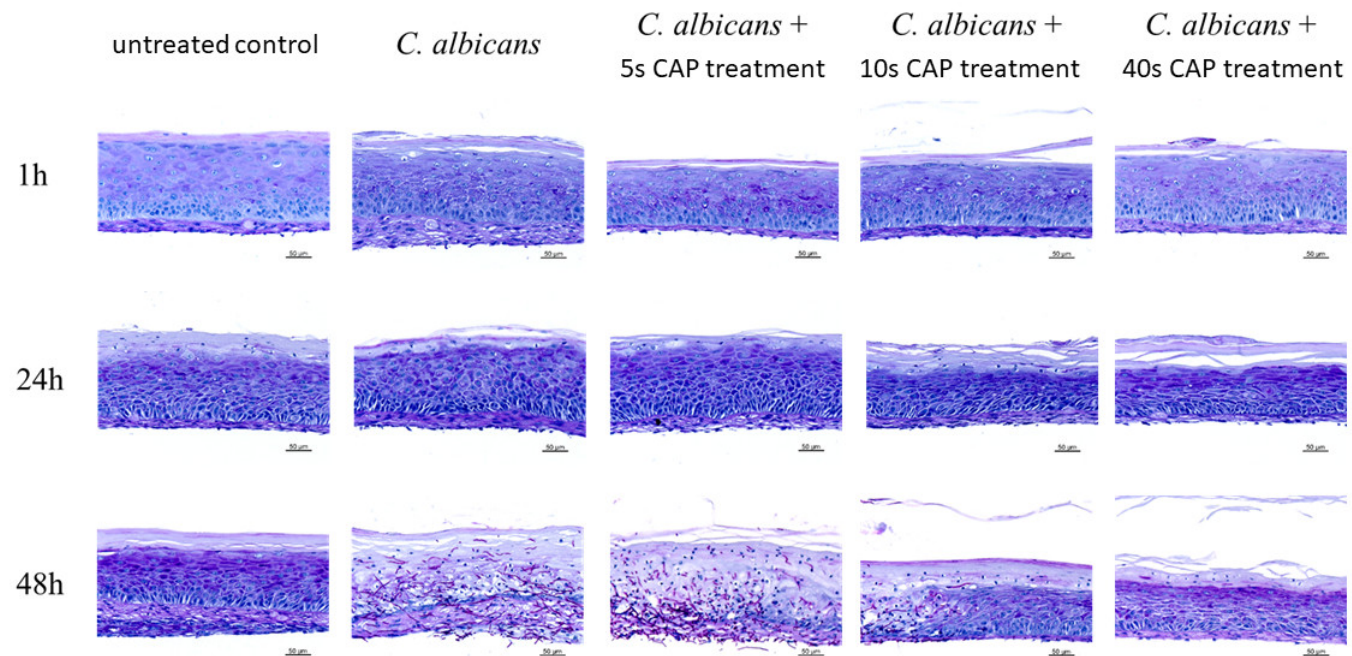

Figure S1. **Histological analysis of hyphal growth:** 3D skin models were infected with *C. albicans* and treated with CAP for 5, 10 and 40 s. *C. albicans* hyphal growth was visualized after 1, 24 and 48 hours using PAS staining.

**Commented [M1]:** We removed the title here from the figure, please check it.
